# Supplementary material for: Regulatory Mechanisms of the Ihh/PTHrP Signaling Pathway in Fibrochondrocytes in Entheses of Pig Achilles Tendon
Source: Hindawi journal article supplement (doi:10.1155/2016/8235172), 2016-01-01

600  
500  
400  
300  
200  
100

M

Control 3h

Control 6h

Control 12h

Control 24h

Cyclo+ 3h

Cyclo+ 6h

Cyclo+ 12h

Cyclo+ 12h-2

Cyclo+ 12h

PTHrP+ 3h

PTHrP+ 6h

PTHrP+ 12h

PTHrP+ 12h-2

PTHrP+ 24h

C+P 3h

C+P 6h

C+P 6h-2

C+P 12h

C+P 24h

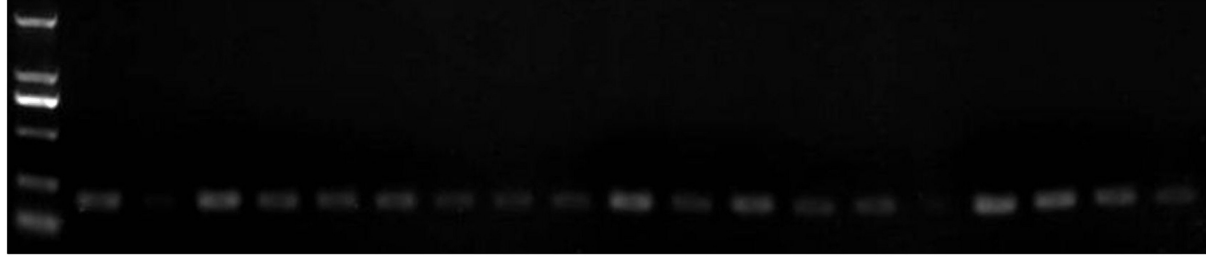

Supplement: f1 [file 8235172.f1.zip]
