# Supplementary figures and images for: Regulatory Mechanisms of the Ihh/PTHrP Signaling Pathway in Fibrochondrocytes in Entheses of Pig Achilles Tendon
Source: Hindawi journal article supplement (doi:10.1155/2016/8235172), 2016-01-01

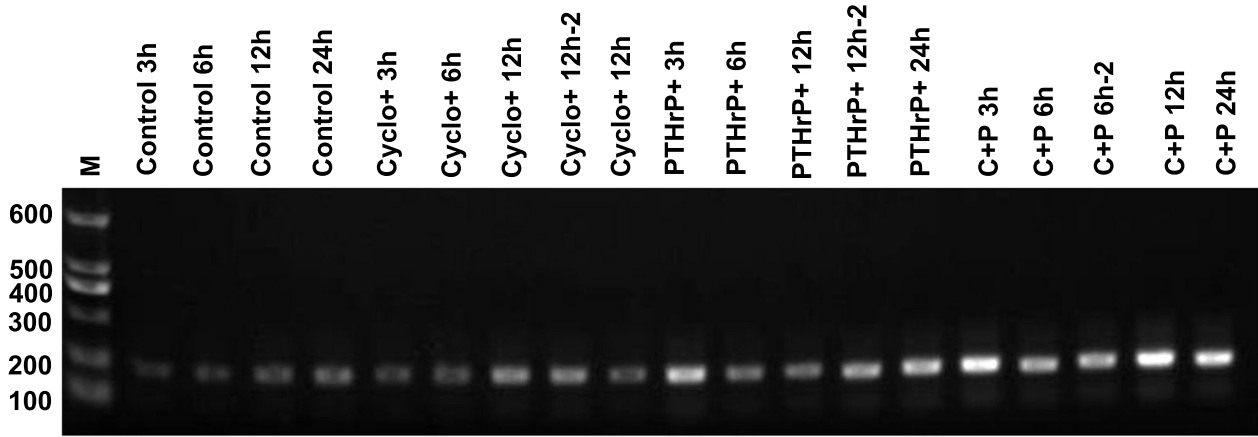

Supplement: f1 [file 8235172.f1.zip]

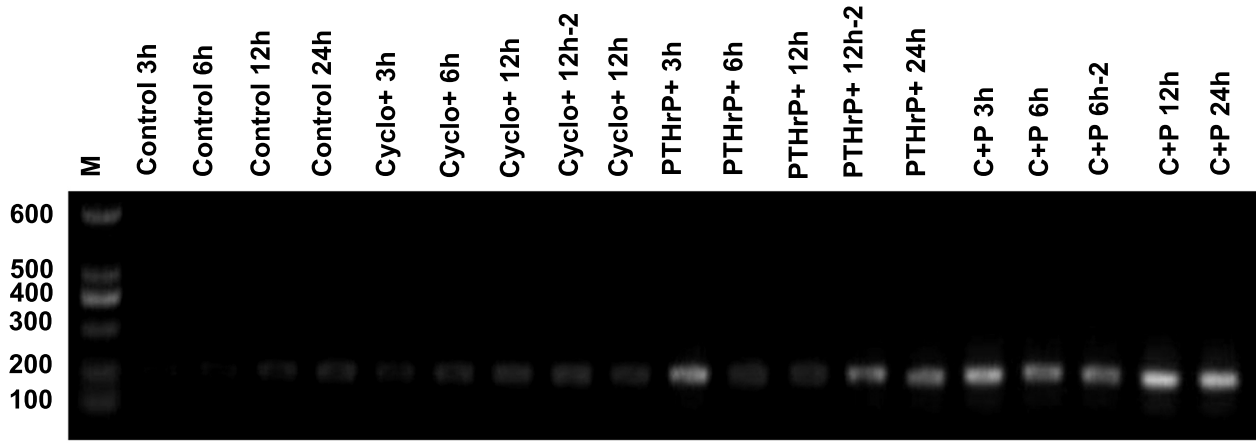

Supplement: f1 [file 8235172.f1.zip]

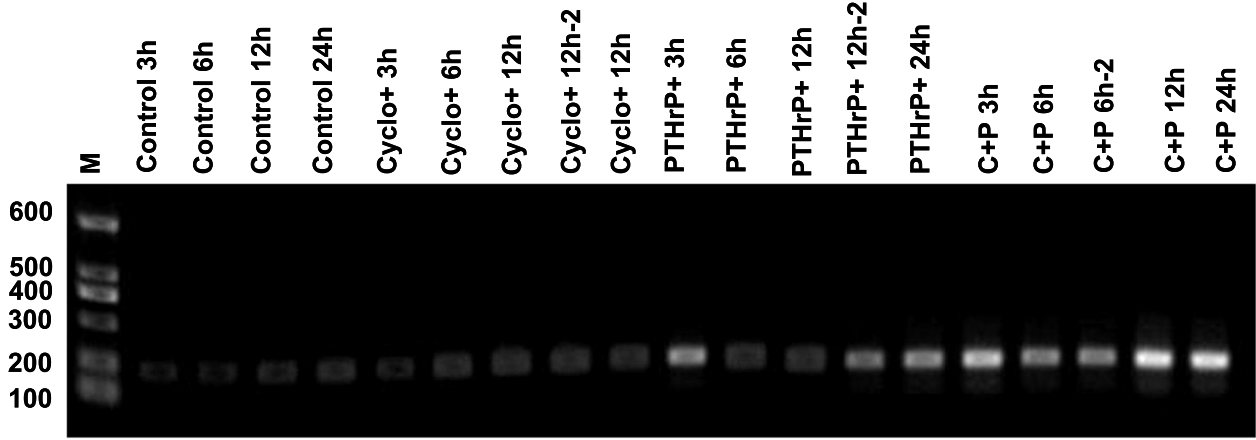

Supplement: f1 [file 8235172.f1.zip]

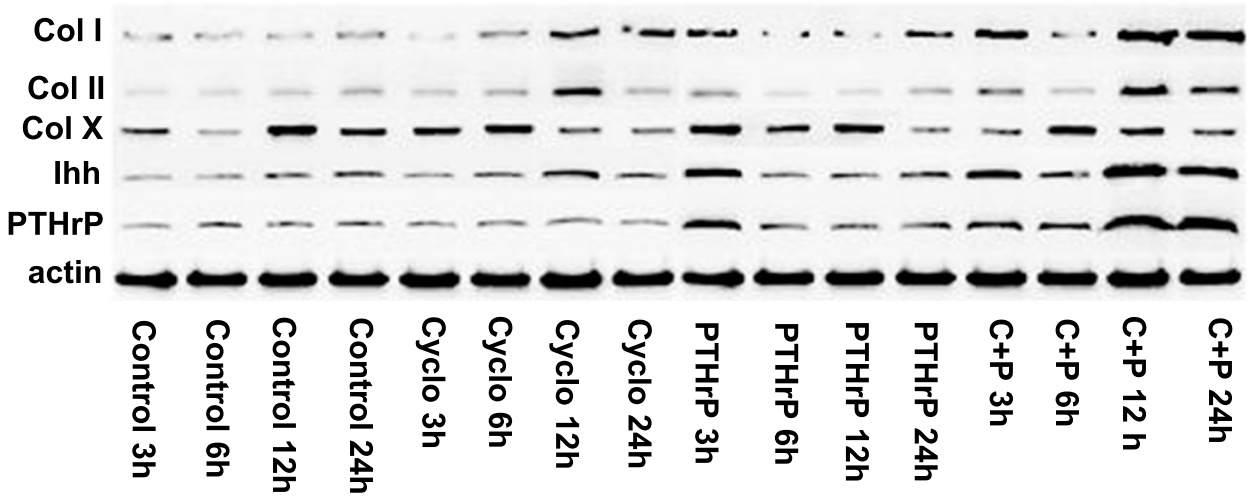

Supplement: f1 [file 8235172.f1.zip]

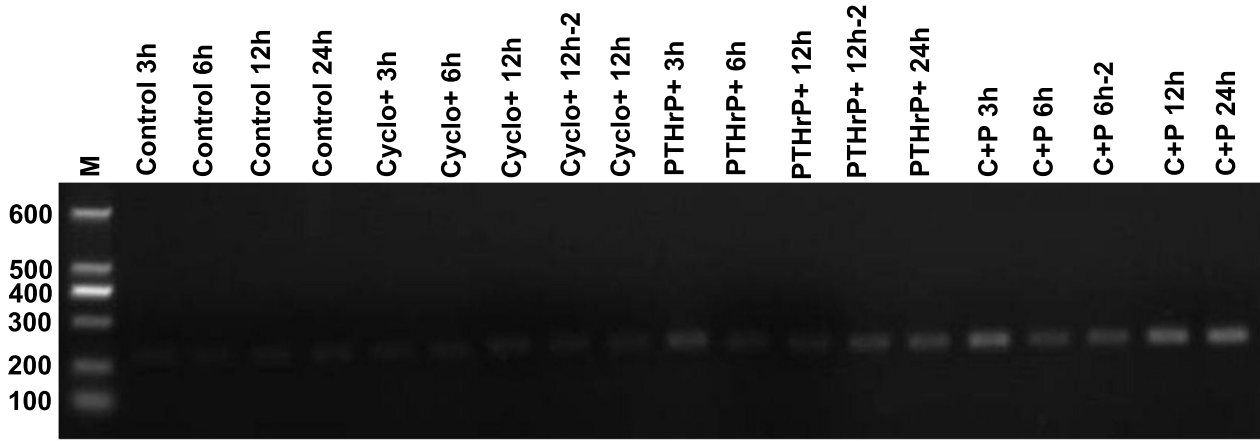

Supplement: f1 [file 8235172.f1.zip]
